# Supplementary material for: Bacteriophage Transcytosis Provides a Mechanism To Cross Epithelial Cell Layers
Source: PubMed Central journal article supplement (PMC5698557; doi:10.1128/mbio.01874-17), 2017-11-21
Supplement: mbo006173601st1.pdf [file mbo006173601st1.pdf]

| Apical-to-basal transcytosis |                   |            | Basal-to-apical transcytosis |                   |            |
|------------------------------|-------------------|------------|------------------------------|-------------------|------------|
| Applied                      | Collected         | Percentage | Applied                      | Collected         | Percentage |
| $1.1 \times 10^7$            | $5 \times 10^3$   | 0.05%      | $6 \times 10^6$              | $3 \times 10^2$   | 0.005%     |
| $1.8 \times 10^7$            | $1.9 \times 10^4$ | 0.1%       | $1.2 \times 10^7$            | 0                 | 0%         |
| $1.2 \times 10^7$            | $3.7 \times 10^3$ | 0.03%      | $8 \times 10^6$              | 0                 | 0%         |
| $2.5 \times 10^7$            | $1.2 \times 10^4$ | 0.05%      | $2.8 \times 10^7$            | 0                 | 0%         |
| $8.7 \times 10^6$            | $1.3 \times 10^4$ | 0.14%      | $2.7 \times 10^7$            | $1.2 \times 10^2$ | 0.0004%    |
| $3.8 \times 10^7$            | $6.6 \times 10^4$ | 0.17%      | $7.6 \times 10^7$            | 0                 | 0%         |
| $9.2 \times 10^6$            | $2.5 \times 10^4$ | 0.27%      | $7.2 \times 10^7$            | 0                 | 0%         |
| $3.3 \times 10^7$            | $4.8 \times 10^4$ | 0.15%      | $3.1 \times 10^7$            | 0                 | 0%         |
| $9.2 \times 10^7$            | $2 \times 10^4$   | 0.02%      | $3.5 \times 10^7$            | 0                 | 0%         |
| $8.6 \times 10^7$            | $2.5 \times 10^4$ | 0.03%      | $3.2 \times 10^7$            | $8.3 \times 10^2$ | 0.0026%    |
