# Supplementary material for: Bacteriophage Transcytosis Provides a Mechanism To Cross Epithelial Cell Layers
Source: PubMed Central journal article supplement (PMC5698557; doi:10.1128/mbio.01874-17), 2017-11-21
Supplement: mbo006173601st2.pdf [file mbo006173601st2.pdf]

| Cells | Apical-to-basal transcytosis |          |      | Basal-to-apical transcytosis |          |      | Mann-Whitney<br>two tailed |          | Paired t-test     |           |          |
|-------|------------------------------|----------|------|------------------------------|----------|------|----------------------------|----------|-------------------|-----------|----------|
|       | Median $\pm$ s.d.            | <i>n</i> | CV   | Median $\pm$ s.d.            | <i>n</i> | CV   | <i>Non-parametric</i>      |          | <i>Parametric</i> |           |          |
|       |                              |          |      |                              |          |      | U                          | <i>P</i> | <i>t</i>          | <i>df</i> | <i>P</i> |
| MDCK  | $1.95 \pm 1.94 \times 10^4$  | 11       | 90%  | $1 \pm 267$                  | 11       | 224% | 0                          | <0.0001  | 3.8               | 9         | 0.0042   |
| T84   | $.79 \pm 1.74 \times 10^4$   | 7        | 218% | $60 \pm 72$                  | 5        | 118% | 2                          | 0.008    | 2.3               | 3         | 0.1031   |
| CaCo2 | $1.6 \pm 1.3 \times 10^4$    | 3        | 67%  | $1 \pm 4$                    | 5        | 143% | 0                          | 0.0179   | 2.6               | 2         | 0.1231   |
| A549  | $1.6 \pm 2.2 \times 10^3$    | 12       | 89%  | $10 \pm 54$                  | 11       | 137% | 0                          | <0.0001  | 3.6               | 10        | 0.0046   |
| Huh7  | $2.3 \pm .47 \times 10^5$    | 4        | 20%  | $15 \pm 71$                  | 4        | 156% | 0                          | 0.0286   | 3                 | 9         | 0.0148   |
| hBMec | $.48 \pm 2 \times 10^4$      | 16       | 131% | $1 \pm 314$                  | 10       | 297% | 3                          | <0.0001  | 9.7               | 3         | 0.0024   |
