# Supplementary material for: Bacteriophage Transcytosis Provides a Mechanism To Cross Epithelial Cell Layers
Source: PubMed Central journal article supplement (PMC5698557; doi:10.1128/mbio.01874-17), 2017-11-21
Supplement: mbo006173601st3.pdf [file mbo006173601st3.pdf]

| Phage | Transcytosis percent | Capsid size (nm) | Tail size (nm) | Family       | Bacterial host                | Reference                                                                   |
|-------|----------------------|------------------|----------------|--------------|-------------------------------|-----------------------------------------------------------------------------|
| T3    | 0.028%               | 60               | 23             | Podoviridae  | <i>Escherichia coli</i>       | Fang <i>et al.</i> , <sup>1</sup>                                           |
| T5    | 0.0157%              | 90               | 250            | Siphoviridae | <i>Escherichia coli</i>       | Effantin <i>et al.</i> , <sup>2</sup>                                       |
| T7    | 0.0013%              | 60               | 28             | Podoviridae  | <i>Escherichia coli</i>       | Cuervo <i>et al.</i> , <sup>3</sup>                                         |
| SPO1  | 0.005%               | ~100             | ~160           | Myoviridae   | <i>Bacillus subtilis</i>      | Parker &                                                                    |
| SPP1  | 0.0001%              | 60               | 191            | Siphoviridae | <i>Bacillus subtilis</i>      | Eiserling <sup>4</sup>                                                      |
| P22   | 0.0061%              | 60               | 20             | Podoviridae  | <i>Salmonella typhimurium</i> | Lhuillier <i>et al.</i> , <sup>5</sup><br>Tang <i>et al.</i> , <sup>6</sup> |

## REFERENCES

1. Fang, P.-A. *et al.* Visualization of Bacteriophage T3 Capsids with DNA Incompletely Packaged In Vivo. *J. Mol. Biol.* **384**, 1384–1399 (2008).
2. Effantin, G., Boulanger, P., Neumann, E., Letellier, L. & Conway, J. F. Bacteriophage T5 Structure Reveals Similarities with HK97 and T4 Suggesting Evolutionary Relationships. *J. Mol. Biol.* **361**, 993–1002 (2006).
3. Cuervo, A. *et al.* Structural characterization of the bacteriophage T7 tail machinery. *J. Biol. Chem.* **288**, 26290–9 (2013).
4. Parker, M. L. & Eiserling, F. A. Bacteriophage SPO1 structure and morphogenesis. III. SPO1 proteins and synthesis. *J. Virol.* **46**, 260–9 (1983).
5. Lhuillier, S. *et al.* Structure of bacteriophage SPP1 head-to-tail connection reveals mechanism for viral DNA gating.
6. Tang, L. *et al.* Three-dimensional structure of the bacteriophage P22 tail machine. *EMBO J.* **24**, 2087–95 (2005).
