# Supplementary material for: Bacteriophage Transcytosis Provides a Mechanism To Cross Epithelial Cell Layers
Source: PubMed Central journal article supplement (PMC5698557; doi:10.1128/mbio.01874-17), 2017-11-21
Supplement: mbo006173601st4.pdf [file mbo006173601st4.pdf]

| Fraction    | MDCK cells                |          |      | A549 cells                |          |     |
|-------------|---------------------------|----------|------|---------------------------|----------|-----|
|             | Median $\pm$ s.d.         | <i>n</i> | CV   | Median $\pm$ s.d.         | <i>n</i> | CV  |
| Applied     | $2.7 \pm 3.1 \times 10^8$ | 6        | 82%  | $2.1 \pm 2.8 \times 10^8$ | 5        | 77% |
| Cell Lysate | $2 \pm 1 \times 10^4$     | 5        | 53%  | $2.6 \pm 2.3 \times 10^4$ | 9        | 70% |
| 1           | $40 \pm 41$               | 4        | 87%  | $30 \pm 17$               | 4        | 49% |
| 2           | $130 \pm 149$             | 4        | 104% | $100 \pm 62$              | 5        | 60% |
| 3           | $270 \pm 193$             | 3        | 84%  | $80 \pm 68$               | 5        | 67% |
| 4           | $175 \pm 284$             | 4        | 99%  | $155 \pm 55$              | 6        | 40% |
| 5           | $400 \pm 194$             | 3        | 66%  | $310 \pm 172$             | 8        | 50% |
| 6           | $3.8 \pm 3.1 \times 10^3$ | 4        | 91%  | $4.5 \pm 2.3 \times 10^3$ | 8        | 61% |
| 7           | $790 \pm 304$             | 5        | 38%  | $2.9 \pm 0.7 \times 10^3$ | 8        | 24% |
| 8           | $755 \pm 702$             | 4        | 78%  | $4.4 \pm 3.1 \times 10^3$ | 8        | 61% |
| 9           | $290 \pm 55$              | 3        | 21%  | $3.1 \pm 1.4 \times 10^3$ | 8        | 43% |
| 10          | $10 \pm 6$                | 3        | 43%  | $100 \pm 66$              | 8        | 46% |
