# Supplementary material for: Bacteriophage Transcytosis Provides a Mechanism To Cross Epithelial Cell Layers
Source: PubMed Central journal article supplement (PMC5698557; doi:10.1128/mbio.01874-17), 2017-11-21
Supplement: mbo006173601st5.pdf [file mbo006173601st5.pdf]

| Solvent transcytosis    |          |     | Inhibitors  |                         | Inhibitor transcytosis    |          |     | One-way ANOVA<br><i>Non-parametric,<br/>Kruskal-Wallis</i> |          | One-way ANOVA<br><i>Parametric</i> |          |
|-------------------------|----------|-----|-------------|-------------------------|---------------------------|----------|-----|------------------------------------------------------------|----------|------------------------------------|----------|
| Median $\pm$ s.d.       | <i>n</i> | CV  | Inhibitor   | Conc.                   | Median $\pm$ s.d.         | <i>n</i> | CV  | Mean rank diff.                                            | <i>P</i> | Mean diff.                         | <i>P</i> |
| $7.9 \pm 3 \times 10^4$ | 40       | 41% | Brefeldin A | $5 \mu\text{g mL}^{-1}$ | $2.3 \pm 2.2 \times 10^4$ | 8        | 73% | 27.36                                                      | 0.003    | $4.4 \times 10^4$                  | 0.0004   |
| $7.9 \pm 3 \times 10^4$ | 40       | 41% | Wortmannin  | 100 nM                  | $8.1 \pm 2.9 \times 10^4$ | 8        | 36% | -5.14                                                      | >0.99    | $-4.5 \times 10^3$                 | 0.99     |
| $7.9 \pm 3 \times 10^4$ | 40       | 41% | Bafilomycin | 0.5 $\mu\text{M}$       | $1 \pm .19 \times 10^5$   | 3        | 21% | -13.58                                                     | >0.99    | $-1.9 \times 10^4$                 | 0.67     |
| $7.9 \pm 3 \times 10^4$ | 40       | 41% | Chloroquine | 100 $\mu\text{M}$       | $5.3 \pm 2.7 \times 10^4$ | 4        | 42% | 4.93                                                       | >0.99    | $1.1 \times 10^4$                  | 0.90     |
| $7.9 \pm 3 \times 10^4$ | 40       | 41% | W-7         | 100 $\mu\text{M}$       | $8.2 \pm 1.1 \times 10^4$ | 8        | 14% | -6.95                                                      | >0.99    | $6.6 \times 10^3$                  | 0.95     |
